# Supplementary material
Source: Springer Nature journal article supplement (https://www.springermedizin.de/resource/supplementary/13054_2013_3003_MOESM3_ESM.pdf/9712366)

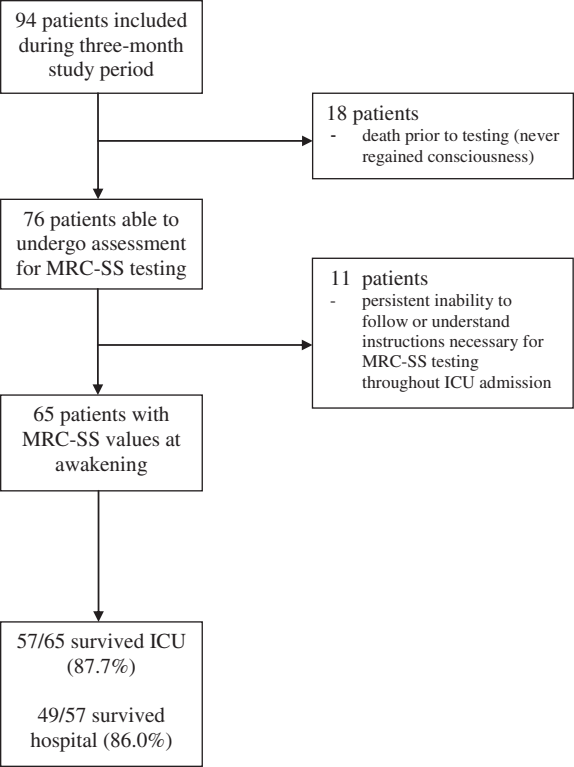

Supplement: MOESM3 [file 9712366]
